# Supplementary material for: Dry Nutrition Delivery System Based on Defatted Soybean Particles and Its Application with β-Carotene
Source: MDPI journal article supplement (doi:10.3390/molecules28083429), 2023-04-13
Supplement: s1 [file s1]

## Supplementary material

Table S1 The release model fitting of free  $\beta$ -carotene and in the delivery system

|                      |                        | Equation                                                        | R <sup>2</sup> |
|----------------------|------------------------|-----------------------------------------------------------------|----------------|
| $\beta$ -carotene    | Zero order model       | $M_t/M_\infty=4.68 t+0.021$                                     | 0.96259        |
|                      | First order model      | $\ln(1-(-2.6\times 10^{-5}) M_t/M_\infty)=9.38\times 10^{-7} t$ | 0.18659        |
|                      | Higuchi model          | $M_t/M_\infty=0.57 t^{1/2}+1.36$                                | 0.8869         |
|                      | Korsmeyer-Peppas model | $M_t/M_\infty=0.88 t^{0.44666}$                                 | 0.87067        |
| 10 min $\beta$ c-DSP | Zero order model       | $M_t/M_\infty=2.24 t+0.010$                                     | 0.97162        |
|                      | First order model      | $\ln(1-(0.15) M_t/M_\infty)=-0.00631 t$                         | 0.89042        |
|                      | Higuchi model          | $M_t/M_\infty=0.29 t^{1/2}+0.43$                                | 0.98321        |
|                      | Korsmeyer-Peppas model | $M_t/M_\infty=0.41 t^{0.45486}$                                 | 0.97858        |
| 30 min $\beta$ c-DSP | Zero order model       | $M_t/M_\infty=2.31 t+0.0084$                                    | 0.96999        |
|                      | First order model      | $\ln(1-(0.17) M_t/M_\infty)=-0.00782 t$                         | 0.83459        |
|                      | Higuchi model          | $M_t/M_\infty=0.24 t^{1/2}+0.84$                                | 0.98203        |
|                      | Korsmeyer-Peppas model | $M_t/M_\infty=0.53 t^{0.4941}$                                  | 0.97498        |
